# Supplementary material for: High-quality-factor anodic alumina optical microcavities prepared by cyclic anodizing with voltage versus optical path length modulation
Source: Royal Society of Chemistry journal article supplement (doi:10.1039/c9tc07079f), 2020-01-01
Supplement: c9tc07079f1.pdf [file c9tc07079f1.pdf]

# Electronic Supplementary Information

**High-quality-factor anodic alumina optical microcavities  
prepared by cyclic anodizing with voltage versus optical  
path length modulation**

**Sergey E. Kushnir,<sup>\*a,b</sup> Tatyana Yu. Komarova<sup>b</sup> and Kirill S. Napolskii<sup>a,b</sup>**

*<sup>a</sup>Lomonosov Moscow State University, Chemistry Department, 119991, Moscow, Russia.*

*<sup>b</sup>Lomonosov Moscow State University, Department of Materials Science, 119991, Moscow, Russia.*

**\*E-Mail:** [kushnir@elch.chem.msu.ru](mailto:kushnir@elch.chem.msu.ru)

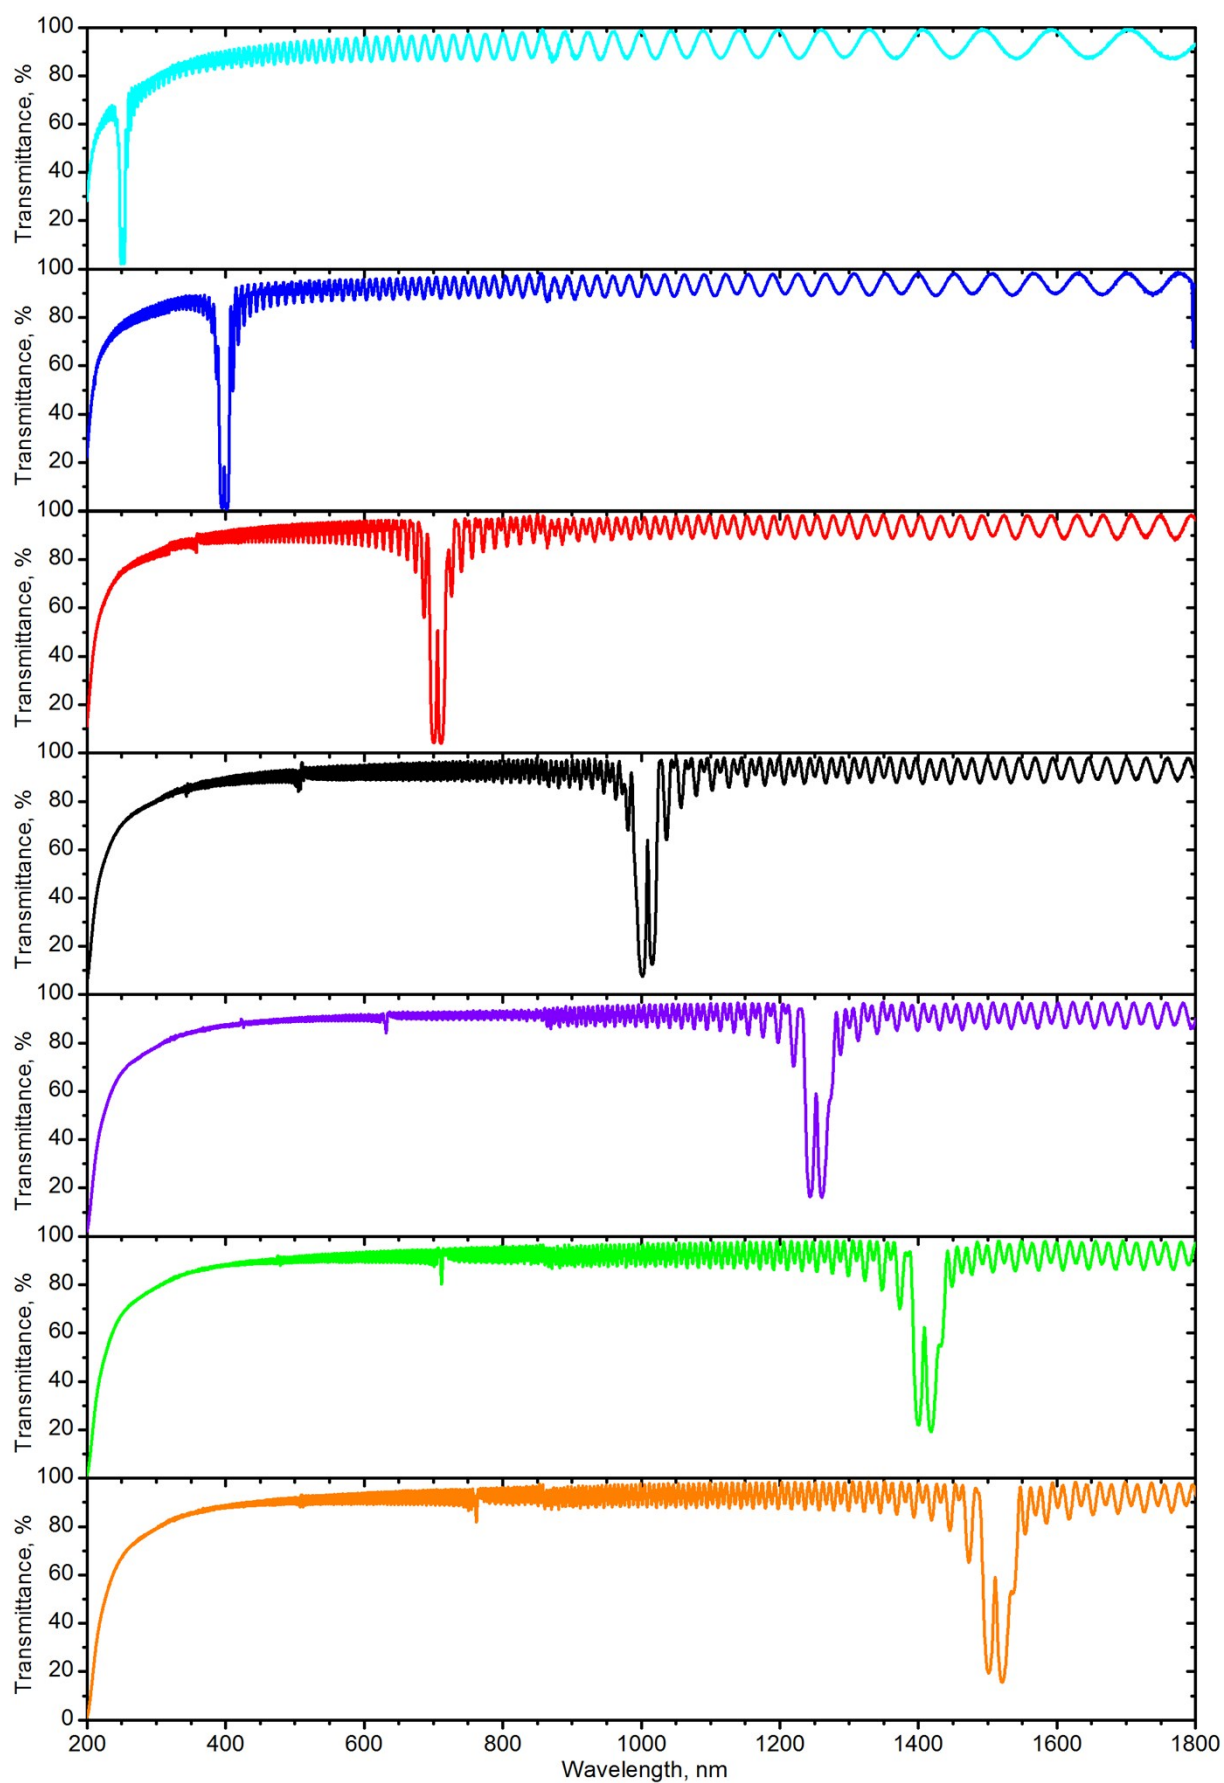

**Figure S1.** Transmittance spectra of prepared AAO optical microcavities: MC250 (cyan), MC400 (blue), MC700 (red), MC1000 (black), MC1250 (violet), MC1400 (green), and MC1500 (orange). Spectra were recorded at normal incidence.

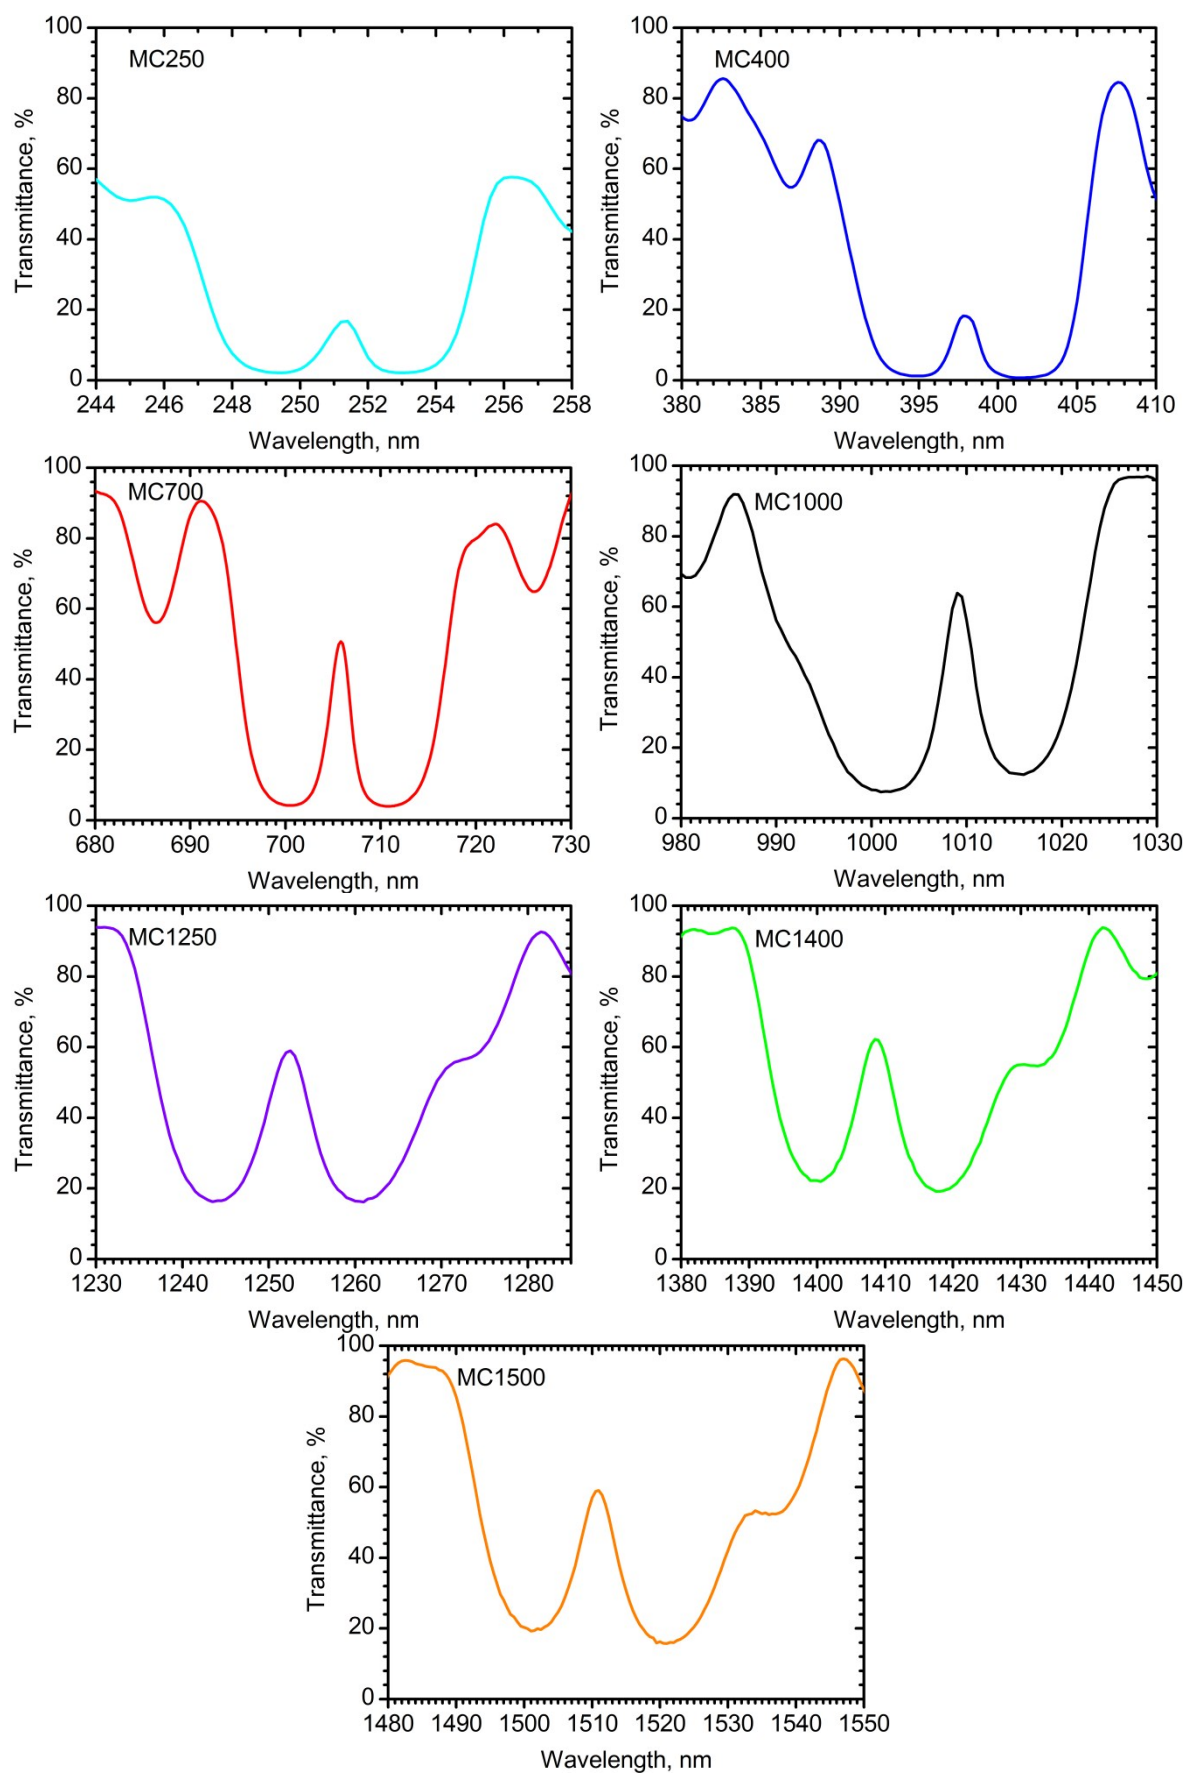

**Figure S2.** Transmittance spectra of prepared anodic alumina optical microcavities in the vicinity of resonance band: MC250 (cyan), MC400 (blue), MC700 (red), MC1000 (black), MC1250 (violet), MC1400 (green), and MC1500 (orange). The spectra were recorded at normal incidence.

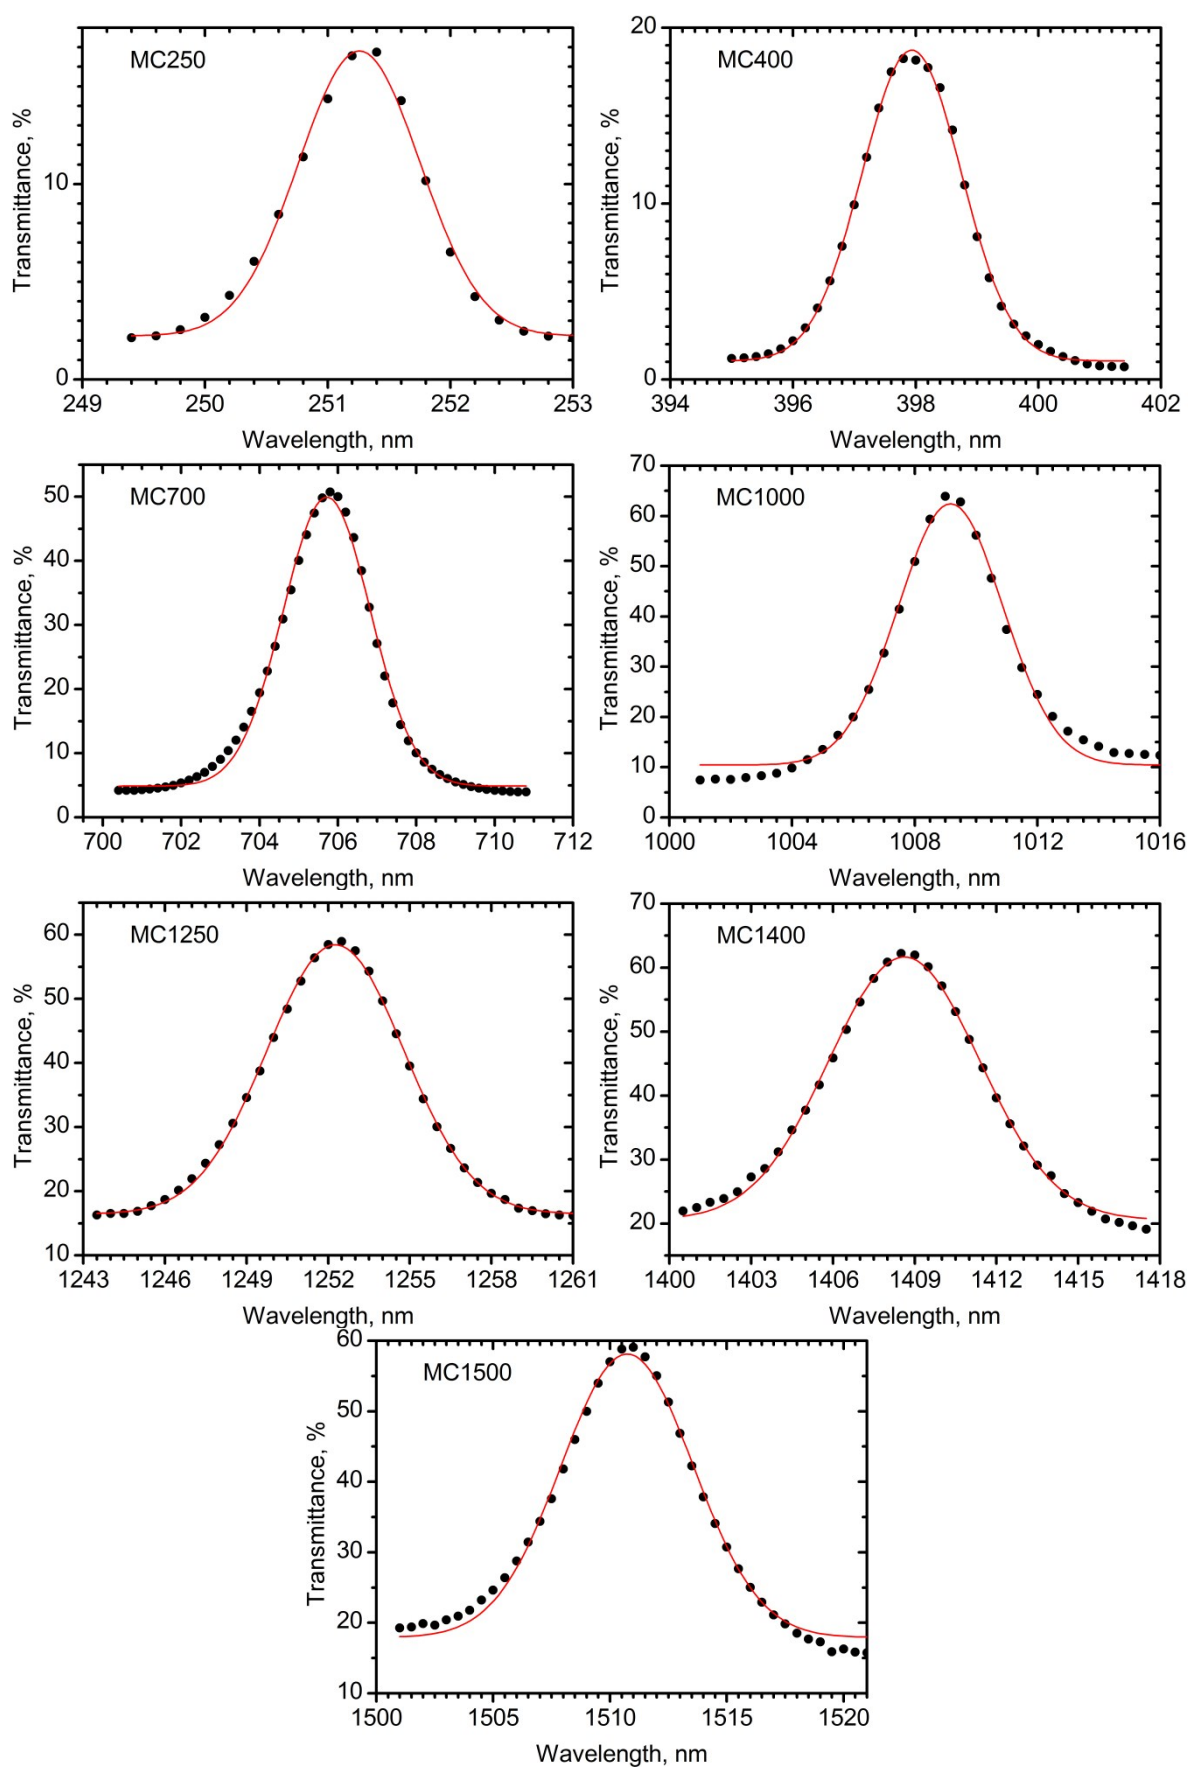

**Figure S3.** Gaussian fittings (red line) of resonance bands on transmittance spectra of prepared anodic alumina optical microcavities (black circles).

**Table S1.** Parameters of resonance bands obtained by Gaussian fitting of transmittance spectra of optical microcavities: the position of resonance band –  $\lambda_R$ , full-width at half maximum – FWHM, quality factor – Q-factor, peak intensity, the ratio of the resonance peak intensity to the FWHM –  $Q_d$ , baseline of Gaussian fitting –  $y_0$ , and fitting correlation coefficient –  $R^2$ .

| Sample | $\lambda_R$ , nm | FWHM, nm | Q-factor | Intensity, %T | $Q_d$ | $y_0$ , %T | $R^2$ |
|--------|------------------|----------|----------|---------------|-------|------------|-------|
| MC250  | 251.3            | 1.168    | 215      | 14.6          | 12.5  | 2.2        | 0.994 |
| MC400  | 397.9            | 1.902    | 209      | 17.7          | 9.3   | 1.0        | 0.998 |
| MC700  | 705.7            | 2.624    | 269      | 45.1          | 17.2  | 4.9        | 0.996 |
| MC1000 | 1009.2           | 4.020    | 251      | 52.0          | 12.9  | 10.4       | 0.989 |
| MC1250 | 1252.3           | 5.938    | 211      | 42.0          | 7.1   | 16.4       | 0.999 |
| MC1400 | 1408.6           | 6.511    | 216      | 41.1          | 6.3   | 20.6       | 0.997 |
| MC1500 | 1510.7           | 6.651    | 227      | 40.2          | 6.0   | 17.9       | 0.993 |
